# Supplementary material for: Choice of initial antiretroviral drugs and treatment outcomes among HIV-infected patients in sub-Saharan Africa: systematic review and meta-analysis of observational studies
Source: PubMed Central journal article supplement (PMC5574138; doi:10.1186/s13643-017-0567-7), 2017-08-25
Supplement: 13643_2017_567_MOESM2_ESM.pdf [file 13643_2017_567_MOESM2_ESM.pdf]

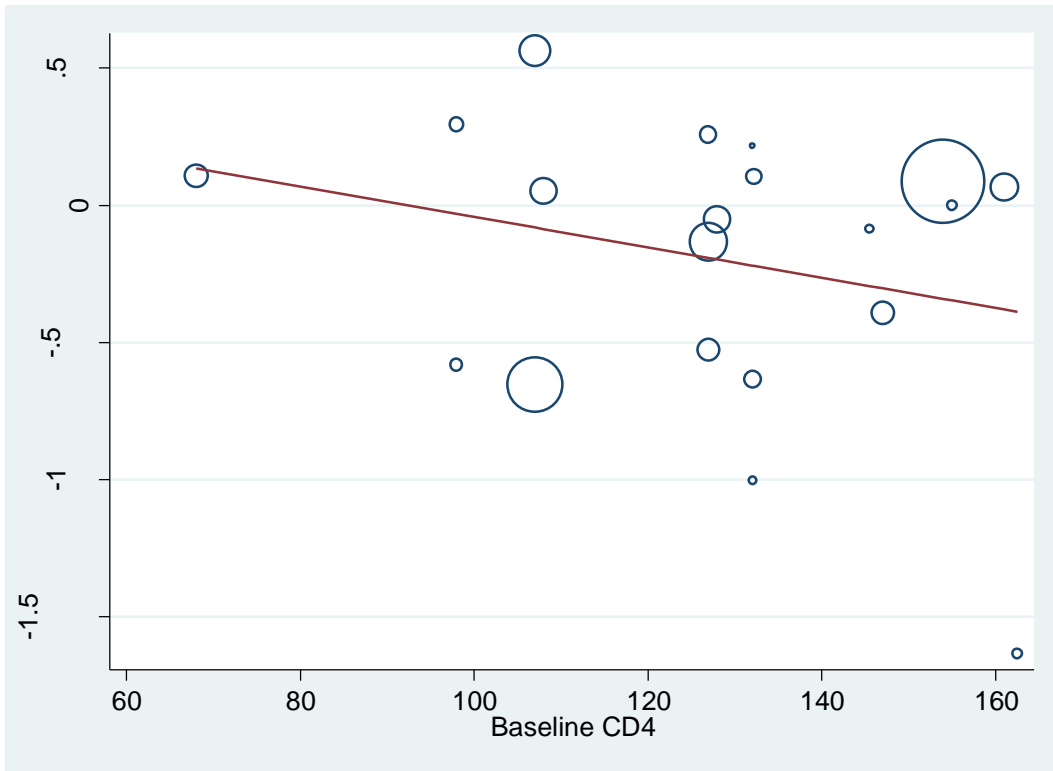

Figure S1. Bubble plot of the fitted meta-regression for baseline CD4 cell counts

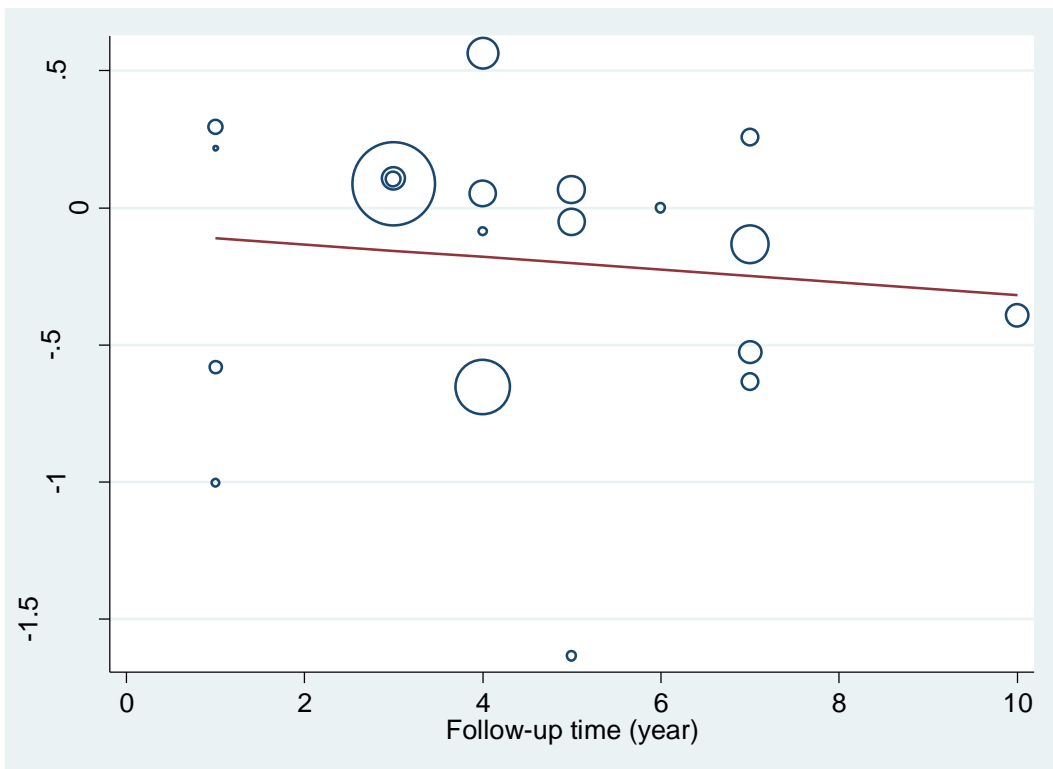

Figure S2. Bubble plot of the fitted meta-regression for follow-up time in years

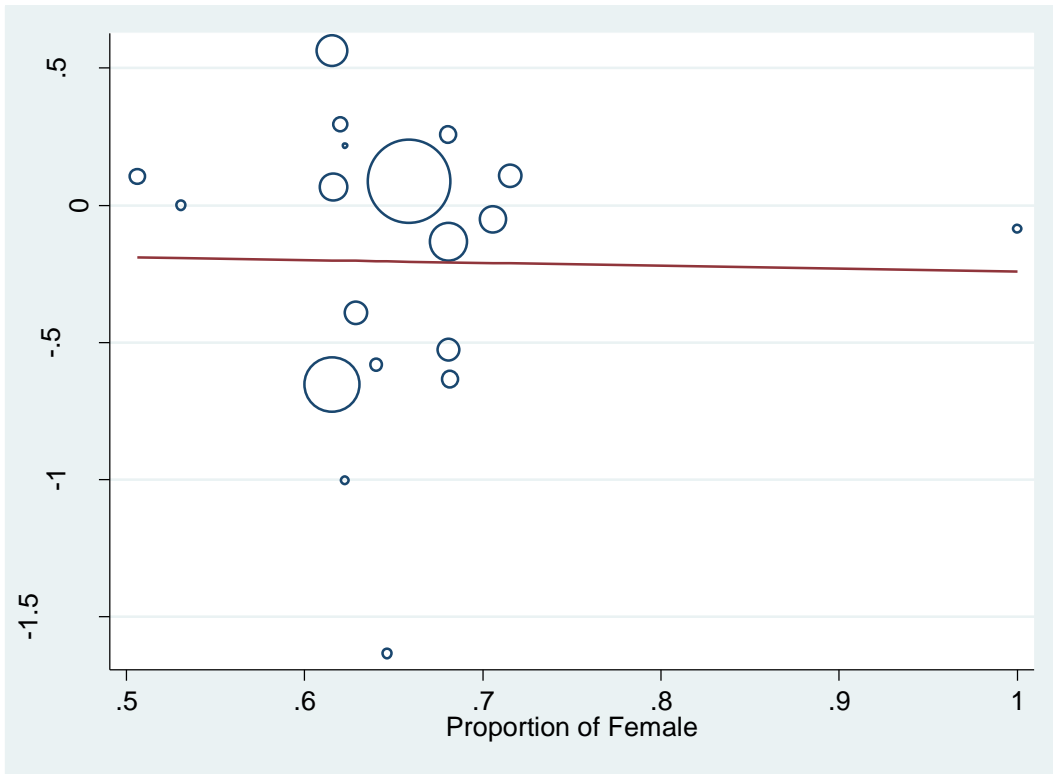

Figure S3. Bubble plot of the fitted meta-regression for proportion of female
